# Supplementary material for: Enamel Matrix Derivatives as an Adjunct to Alveolar Ridge Preservation—A Systematic Review
Source: MDPI journal article supplement (doi:10.3390/dj11040100), 2023-04-10
Supplement: s1 [file s1]

**Table S1: Risk of bias assessment**

|                                                                     | Random<br>sequence<br>generation | Allocation<br>concealment | Blinding of<br>participants and<br>personnel | Blinding of<br>outcome<br>assessment | incomplete<br>outcome data | Selective<br>reporting | Other<br>Bias | overall risk of bias |
|---------------------------------------------------------------------|----------------------------------|---------------------------|----------------------------------------------|--------------------------------------|----------------------------|------------------------|---------------|----------------------|
| <b>Nevins<br/>2011</b>                                              | +                                | +                         | -                                            | -                                    | +                          | +                      | ?             | High Risk of Bias    |
| <b>Lee<br/>2019</b>                                                 | +                                | +                         | +                                            | ?                                    | +                          | +                      | +             | Low Risk of Bias     |
| <b>Lee<br/>2020</b>                                                 | +                                | +                         | +                                            | ?                                    | +                          | +                      | +             | Low Risk of Bias     |
| <b>Mercado<br/>2021<br/>Single<br/>center<br/>RCT<br/>Australia</b> | +                                | +                         | —                                            | +                                    | +                          | +                      | +             | Low Risk of Bias     |
| <b>Bonta<br/>2022<br/>Single<br/>center<br/>RCT<br/>Argentina</b>   | +                                | +                         | ?                                            | ?                                    | +                          | +                      | +             | High Risk of Bias    |
